# Supplementary material
Source: Research Square preprint supplement (doi:10.21203/rs.3.rs-10305529/v1)
Supplement: Supplementary file 1 [file 4c6f5947fc9a4a4ac7be5889.docx]

**Self-report checklist of nurses’ workflow interruptions**

| **Item No.** | **Content: I had to stop what I was doing due to...** | **At Least 5 Times per Day** | **Average 3-4 Times per Day** | **Average 1-2 Time(s) per Day** | **3-4 Times a Week** | **1-2 Time(s) a Week** | **Almost Never** |
| --- | --- | --- | --- | --- | --- | --- | --- |
| 1 | a patient suddenly asking for something. | 6 | 5 | 4 | 3 | 2 | 1 |
| 2 | a doctor suddenly asking for something. | 6 | 5 | 4 | 3 | 2 | 1 |
| 3 | a colleague (nurse) suddenly asking for something. | 6 | 5 | 4 | 3 | 2 | 1 |
| 4 | an employee from another department suddenly asking for something. | 6 | 5 | 4 | 3 | 2 | 1 |
| 5 | a guardian suddenly asking for something. | 6 | 5 | 4 | 3 | 2 | 1 |
| 6 | several people suddenly asking for something. | 6 | 5 | 4 | 3 | 2 | 1 |
| 7 | an emergency (safety, accident, fire, theft, etc.) | 6 | 5 | 4 | 3 | 2 | 1 |
| 8 | the sudden fuss of a patient and/or their guardian. | 6 | 5 | 4 | 3 | 2 | 1 |
| 9 | a sudden change in a patient’s condition. | 6 | 5 | 4 | 3 | 2 | 1 |
| 10 | a sudden increase in the number of patients. | 6 | 5 | 4 | 3 | 2 | 1 |
| 11 | the sound of an alarm from a medical device or machine. | 6 | 5 | 4 | 3 | 2 | 1 |
| 12 | equipment malfunction. | 6 | 5 | 4 | 3 | 2 | 1 |
| 13 | Responding to personal phone calls. | 6 | 5 | 4 | 3 | 2 | 1 |
| 14 | Answering departmental calls. | 6 | 5 | 4 | 3 | 2 | 1 |
| 15 | Patient family inquiries or requests. | 6 | 5 | 4 | 3 | 2 | 1 |
| 16 | Physicians’ delayed rounds. | 6 | 5 | 4 | 3 | 2 | 1 |
| 17 | Patient transfer to another unit or for diagnostic procedures. | 6 | 5 | 4 | 3 | 2 | 1 |
| 18 | Patient or family resistance to treatment or care. | 6 | 5 | 4 | 3 | 2 | 1 |
| 19 | Coworker tardiness. | 6 | 5 | 4 | 3 | 2 | 1 |
| 20 | Forgetting to complete a task. | 6 | 5 | 4 | 3 | 2 | 1 |

The final scale developed to assess nursing workflow interruptions includes 20 items across three components: human factors, environmental factors, and human–environmental factors. Higher scores indicate more frequent perceived nursing workflow interruptions.
