# Supplementary material
Source: Research Square preprint supplement (doi:10.21203/rs.3.rs-10305529/v1)
Supplement: Supplementary file 2 [file a38643fd502459f6c557d4ec.docx]

**Demographic Information Questionnaire**

A. Personal Information

| **No.** | **Question / variable** | **Response options** |
| --- | --- | --- |
| 1 | Age | ________ years |
| 2 | Gender | ☐ Male  ☐ Female |
| 3 | Marital status | ☐ Single  ☐ Married  ☐ Widowed  ☐ Divorced |
| 4 | Number of children | ________ |
| 5 | Spouse's occupation | ________________________________ |
| 6 | Are you the head of household? | ☐ Yes  ☐ No |
| 7 | Residency status in Kashan and Aran va Bidgol | ☐ Native  ☐ Non-native |
| 8 | Education | ☐ Associate's degree  ☐ Bachelor's student  ☐ Bachelor's degree  ☐ Master's student  ☐ Master's degree  ☐ Doctoral student  ☐ Doctorate |
| 9 | Average monthly family income (million Tomans) | ☐ 5–10  ☐ 11–20  ☐ 21–30  ☐ 31–40  ☐ 41–50  ☐ Above 50 |
| 10 | Housing status | ☐ Owned  ☐ Rented  ☐ Company-provided  ☐ Other (please specify): ____________________ |
| 11 | Do you live with anyone other than your spouse and children? | ☐ Yes  ☐ No |
| 12 | Are you responsible for caring for a sick individual at home? | ☐ Yes  ☐ No |

B. Professional Information

| **No.** | **Question / variable** | **Response options** |
| --- | --- | --- |
| 13 | Employment status | ☐ Permanent  ☐ Contractual  ☐ Temporary  ☐ Corporate Recruitment  ☐ service obligation |
| 14 | Do you have another source of income besides working in the medical field? | ☐ Yes  ☐ No |
| 15 | Current work unit | ☐ Internal medicine  ☐ Surgery  ☐ Emergency  ☐ ICU  ☐ CCU  ☐ Inpatient psychiatric  ☐ ENT  ☐ Pediatrics  ☐ Operating room  ☐ Other (please specify): ____________________ |
| 16 | Length of employment in the current unit | ________ years ________ months |
| 17 | Total nursing experience | ________ years ________ months |
| 18 | Job title (multiple answers allowed) | ☐ Nurse  ☐ Head nurse  ☐ Educational supervisor  ☐ Infection control supervisor  ☐ Staff clinical supervisor  ☐ Rotating clinical supervisor  ☐ Nursing manager  ☐ Other (please specify): ____________________ |
| 19 | Shift type | ☐ Fixed  ☐ Rotating |
| 20 | Dominant shift | ☐ Morning  ☐ Afternoon  ☐ Night  ☐ Long morning and afternoon  ☐ Long afternoon and night  ☐ Long morning and night |
| 21 | Overtime | ☐ Yes  ☐ No |
| 22 | Average monthly overtime hours | ________ hours |
| 23 | Average monthly income (including salary, overtime, bonuses, and nursing fees; million Tomans) | ☐ Maximum 10  ☐ Maximum 15  ☐ Maximum 20  ☐ Maximum 25  ☐ Maximum 30  ☐ Above 30 |
